# Supplementary material
Source: PubMed Central journal article supplement (PMC8901790)
Supplement: 41418_2021_879_MOESM1_ESM.pdf [file 41418_2021_879_MOESM1_ESM.pdf]

## Supplementary Table 1: The target sequences of THAP7-AS1 Smart Silence

### The target sequences of THAP7-AS1 Smart Silencer

5'- AGAAATGGGAGCTCATTAA-3'  
 5'-TGCCACACATCTTCATAATC-3',  
 5'- TCAGAGCTGTGGACCAGTT-3'  
 5'- TAAGGCGCACTTGGCCGAAC-3',  
 5'- TAATGCCACCTGTCAGAGA-3',  
 5'- TATATTGGCCTCAGAAATGG-3'

## Supplementary Table 2. Sequences of primers.

| Name                | Sense primer (5'- to 3')           | Antisense primer (5'- to 3')      |
|---------------------|------------------------------------|-----------------------------------|
| Primers for cloning |                                    |                                   |
| -2000/0             | CGGCTAGCATGCTCCTTCAGAGTCTGGCGGGCA  | CCCAAGCTTTCTTTCCAGATGCCGCGTCACTGC |
| -1002/0             | CGGCTAGCCAGCTACACCAATCGTTCCCCGCA   | CCCAAGCTTTCTTTCCAGATGCCGCGTCACTGC |
| -509/0              | CGGCTAGCCTGTGGAGCCACAAACCCGTGAGCA  | CCCAAGCTTTCTTTCCAGATGCCGCGTCACTGC |
| -257/0              | CGGCTAGCCTTCCCGACTGCATTTCAGTCCCGCC | CCCAAGCTTTCTTTCCAGATGCCGCGTCACTGC |
| -210/0              | CGGCTAGCCACCCACAGGTTCAAGCCTCCTCAG  | CCCAAGCTTTCTTTCCAGATGCCGCGTCACTGC |
| -155/0              | CGGCTAGCGTTGCGACCCGAGGCGAGCAACAAC  | CCCAAGCTTTCTTTCCAGATGCCGCGTCACTGC |
| -101/0              | CGGCTAGCACGCGCGCTGACCTGTGGAAGGAGA  | CCCAAGCTTTCTTTCCAGATGCCGCGTCACTGC |
| Primers for ChIP    |                                    |                                   |
| S1                  | CAAGCCTCGCCTCGGGTTGT               | GCGGGGTCGCAGGGAGGTCT              |
| S2                  | CCACGAGACCTCCCTGCGAC               | CCCCTCTGTACCTGCCAGATG             |
| S3                  | AAGCAGTTTCCTCAGCGTCAT              | TACTGAGGAGGCTTGAACCTG             |

## Supplementary Table 3. Sequences of miR-22 ChIP primers.

| Name                    | Sense primer                    | Antisense primer                |
|-------------------------|---------------------------------|---------------------------------|
| <b>Primers for ChIP</b> |                                 |                                 |
| miR-22-S1               | 5' GGCTCCGGGCAGTAGACCATG 3'     | 5' AGCAGGTGAAAGTCGCGGGAG 3'     |
| miR-22-S2               | 5' CATCACCACCCACCGCCACAC 3'     | 5' CATGGGGTCTCCTGGGGGTTG 3'     |
| miR-22-S3               | 5' CATGGGGTCTCCTGGGGGTTG 3'     | 5' CTCTTCTGACTCTGTCCCAGCC 3'    |
| miR-22-S4               | 5' AACAGACCTGTCCTGCTCTTA 3'     | 5' TAATCTTTGAAGTAGCTGGAAT 3'    |
| miR-22-S5               | 5' TCCAGTACTTCAAAGAATTA 3'      | 5' AGTGTTATTATTTAAACCTTTGG 3'   |
| miR-22-S6               | 5' GAAATACAAAATGTGAAAATTT 3'    | 5' AATAGTGCATGTTATGTGATTC 3'    |
| miR-22-S7               | 5' TAACATGCACTATTTTTACAACCTT 3' | 5' GAATTTATTCCTTTTCTGCTGTAAC 3' |
| miR-22-S8               | 5' CTATTGCAAACCTTCGTTACAGCAG 3' | 5' TACGAATCTATCTTTGGGAATTTA 3'  |
| miR-22-S9               | 5' ACTCTCGTTTGACGTAGCGCTT 3'    | 5'CGCCCTGGCTCTGATTGGCAAG 3'     |

**Supplementary Table 4. Sequences of miR-320 ChIP primers.**

| Name                    | Sense primer                      | Antisense primer                 |
|-------------------------|-----------------------------------|----------------------------------|
| <b>Primers for ChIP</b> |                                   |                                  |
| miR-320-S1              | 5' CGGGAAAAGCTGGGTTGAGAG 3'       | 5' AGGCGAATCCTCACATTGCG 3'       |
| miR-320-S2              | 5' ACCACGCCGCAATGTGAGGAT 3'       | 5' AAGGTCACCATGGAGAACCCGCA 3'    |
| miR-320-S3              | 5' TGCTGCGGGTTCTCCATGGTGA 3'      | 5' CTTCGTGATCAGAAGCGGGTATGAC 3'  |
| miR-320-S4              | 5' TGCCCAGTCATACCCGCTTCTGATC 3'   | 5' GGTCTGGGGGATGGGGGATAACATT 3'  |
| miR-320-S5              | 5' ATCATTTCTACCAGAATGCCACGTAG 3'  | 5' TTGATCGCACCACTGCACTCCCGTC 3'  |
| miR-320-S6              | 5' TTTGAGACGAGGTTTCTCTCTGTTG 3'   | 5' GTTTGGACATCTTTAAGAAACCCATG 3' |
| miR-320-S7              | 5' CTCTAAGACTGCGAAGTTTATGCCT 3'   | 5' GAGGTGGTTGAAGGCAGAGAAT 3'     |
| miR-320-S8              | 5' TTAGGATTCTCTGCCCTTCAACCAC 3'   | 5' CCCAGGATTCAACTAATGTTTGTGTA 3' |
| miR-320-S9              | 5' TCCTACACAAACATTAGTTGAATCCTG 3' | 5' GGCGGTTTCTAAAGAAACTCA 3'      |
| miR-320-S10             | 5' ACGCGCCGTTGGGTACCTTCTT 3'      | 5' CGCCCCTCTCTCCCAGGCAACATG 3'   |
| miR-320-S11             | 5' GACGAGATCACCAGAGGGGACTGA 3'    | 5' TGTCGCGAGCCAAAGGCTCTC 3'      |
| miR-320-S12             | 5' TGAGAGCCTTTGGCTCGCGACAC 3'     | 5' GCGTTGCAGGTGAGGTTGTGACG 3'    |
| miR-320-S13             | 5' AACCTCACCTGCAACGCGACCAG 3'     | 5' GACTCCGGGAAGAACCGGAAGAGA 3'   |
| miR-320-S14             | 5' GGGAGTCAAGAAGGTACCCAAC 3'      | 5' TAGAATTTAAAGAGGGGTAGGCTTG 3'  |
